# Supplementary material
Source: Royal Society of Chemistry journal article supplement (doi:10.1039/d6tc00764c)
Supplement: d6tc00764c1.pdf [file d6tc00764c1.pdf]

## **Supporting Information for**

### **A Superhydrophobic Bilayer Anisotropic Conductive Film with Improved Reliability for Electronic Interconnects**

*Wei Zhao<sup>a,b</sup>, Guoxiang Zhang<sup>a,b</sup>, Peipei Li<sup>a,b\*</sup>, Libo He<sup>c</sup>, Wenfeng Zhu<sup>d</sup>, Lei Li<sup>d</sup>, Houbu Li<sup>d</sup>, Qi Zhang<sup>e</sup>, Zhanchen Guo<sup>a\*</sup>, Xiaowei Liu<sup>f\*</sup>*

*<sup>a</sup> Shaanxi Key Laboratory of High-Orbits-Electron Materials and Protection Technology for Aerospace, School of Advanced Materials and Nanotechnology, Xidian University, Xi'an, Shaanxi, 710071, P.R. China.*

*<sup>b</sup> State Key Laboratory of Electromechanical Integrated Manufacturing of High-performance Electronic Equipments, Xidian University, Xi'an, Shaanxi, 710071, P.R. China.*

*<sup>c</sup> Shanghai Aerospace Resin based Composite Engineering Technology & Research Center, Shanghai Composites Science & Technology Co., Ltd., Shanghai, 201112, P.R. China.*

*<sup>d</sup> Tubular Goods Research Institute, China National Petroleum Corporation & State Key Laboratory of Oil and Gas Equipment, Xi'an Shaanxi, 710065, P.R. China.*

*<sup>e</sup> Zhengzhou Tobacco Research Institute, China National Tobacco Corporation, Zhengzhou, Henan, 450001, P.R. China.*

*<sup>f</sup> Division of Physical Science and Engineering, King Abdullah University of Science and Technology, Thuwal 23955-6900, Kingdom of Saudi Arabia.*

*\*Email: lip@xidian.edu.cn (P. Li), guozhanchen@xidian.edu.cn (Z. Guo), and xiaowei.liu@kaust.edu.sa (X. Liu)*

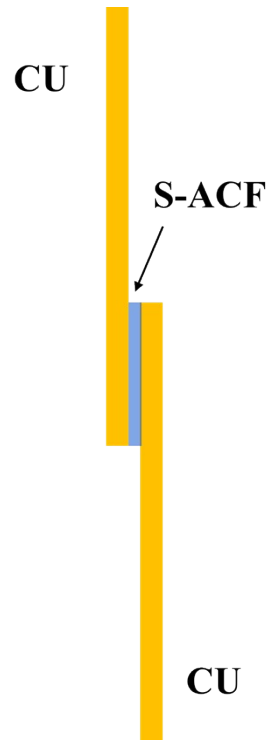

**Figure S1.** Bonding test sample schematic diagram, using two pieces of 40 mm×10 mm×0.3 mm copper sheets, sandwiching 10 mm×5 mm S-ACF in the middle, hot pressing for 10 minutes under 0.3 MPa and 150°C conditions, and then curing for one hour at 150°C, the bonding test sample can be prepared.

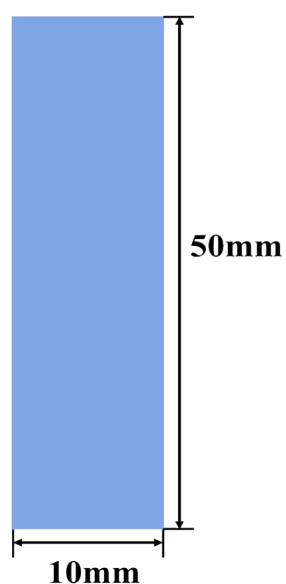

**Figure S2.** Schematic diagram of the tensile test sample. Cut the S-ACF into a 10 mm×50 mm rectangle and cure it at 150 °C for one hour to obtain the tensile test sample.

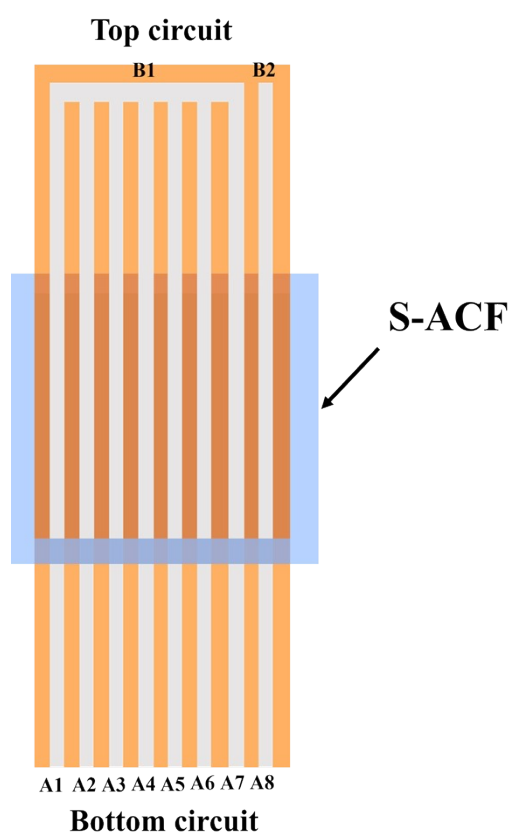

**Figure S3.** Ag electrodes were patterned on a PI film with an electrode spacing of 1 mm. The S-ACF was hot-pressed between the two electrodes at 150 °C under a pressure of 0.3 MPa, followed by curing at 150 °C for 1 h. The resistances measured between A1-A7 and B1 correspond to the Z-axis contact resistance, while the resistance measured between A8 and B1 represents the in-plane (X-Y) resistance. The electrode itself has an inherent resistance measured at 0.6 Ω.

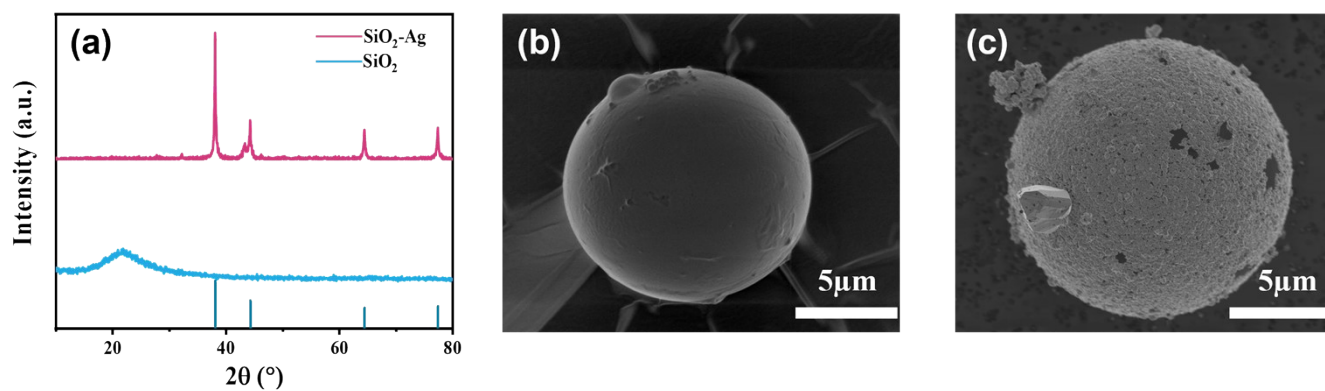

**Figure S4.** Characterization of SiO<sub>2</sub> spheres before and after silver coating: (a) X-ray diffraction patterns of uncoated SiO<sub>2</sub> and silver-coated SiO<sub>2</sub> spheres. (b, c) Scanning electron microscopy images of (b) the pristine SiO<sub>2</sub> spheres and (c) the silver-coated SiO<sub>2</sub> spheres.

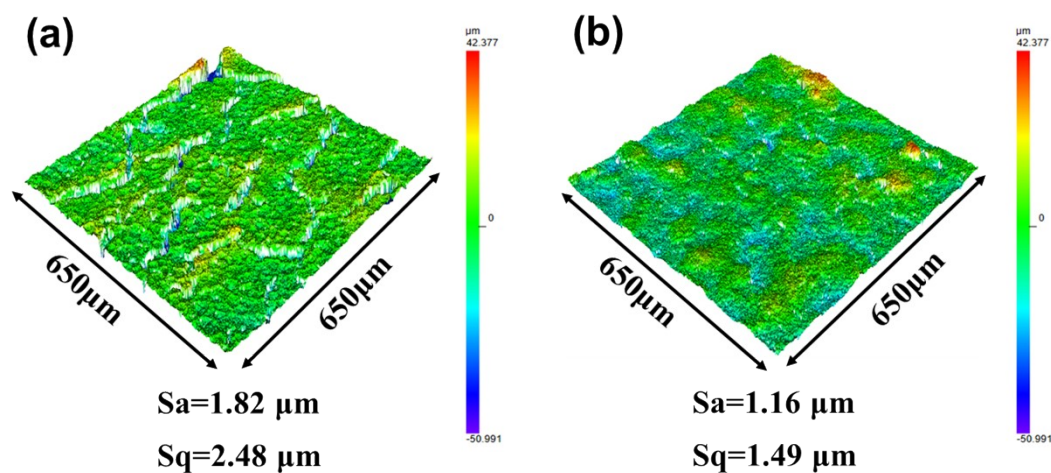

**Figure S5.** Laser scanning confocal microscopy (LSCM) images of S-ACF (a) with 150% pre-stretching and (b) without pre-stretching.

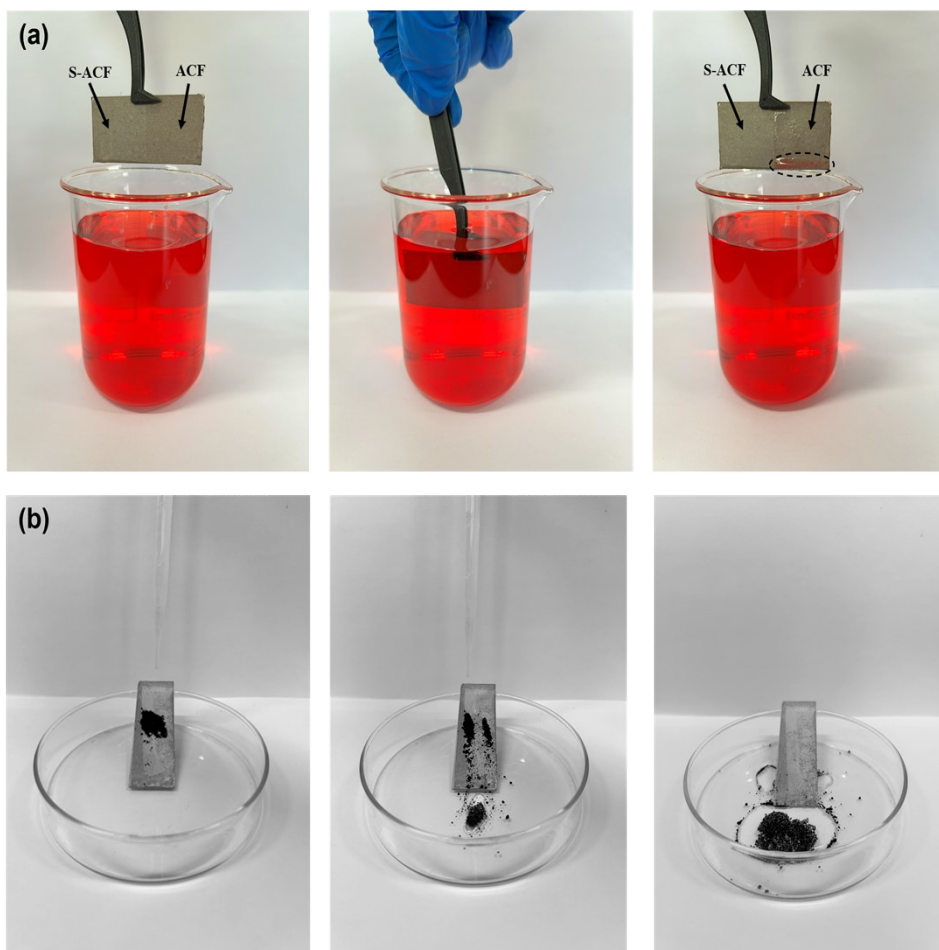

**Figure S6.** Anti-fouling and self-cleaning performance of the S-ACF. (a) Beading of a model ink contaminant on the hydrophobic S-ACF surface. (b) The subsequent removal of the contaminant, demonstrating the self-cleaning effect.

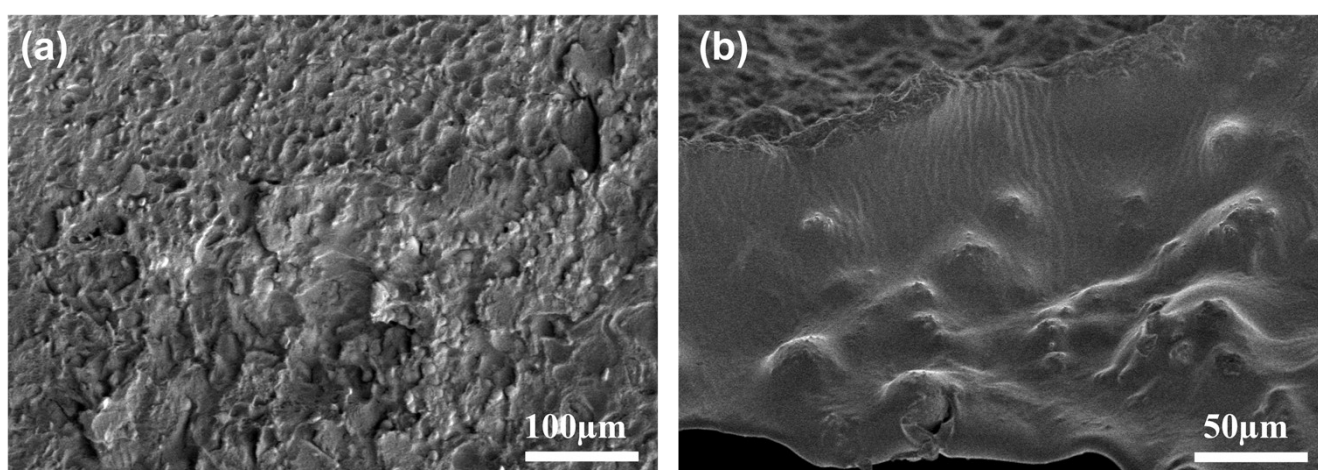

**Figure S7.** Mechanical test fracture surfaces SEM images of the S-ACF. (a) Fracture surfaces SEM micrograph of the S-ACF after the bonding test. (b) Fracture surfaces SEM micrograph of the S-ACF after the tensile test.

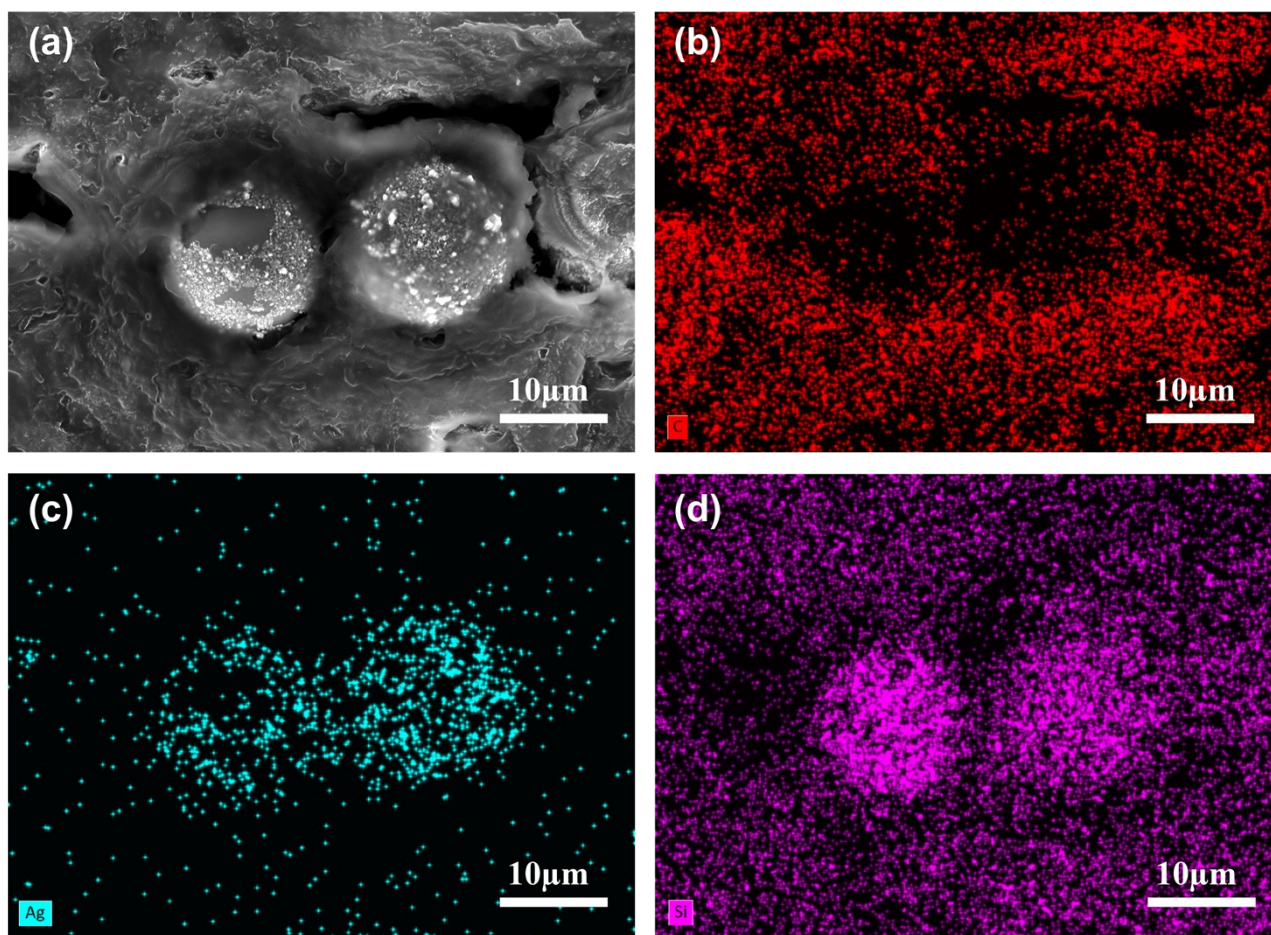

**Figure S8.** Surface SEM image and EDS elemental mapping of the S-ACF after hot pressing. (a) Surface SEM micrograph. (b–d) EDS elemental maps showing the distribution of (b) C, (c) Ag, and (d) Si.

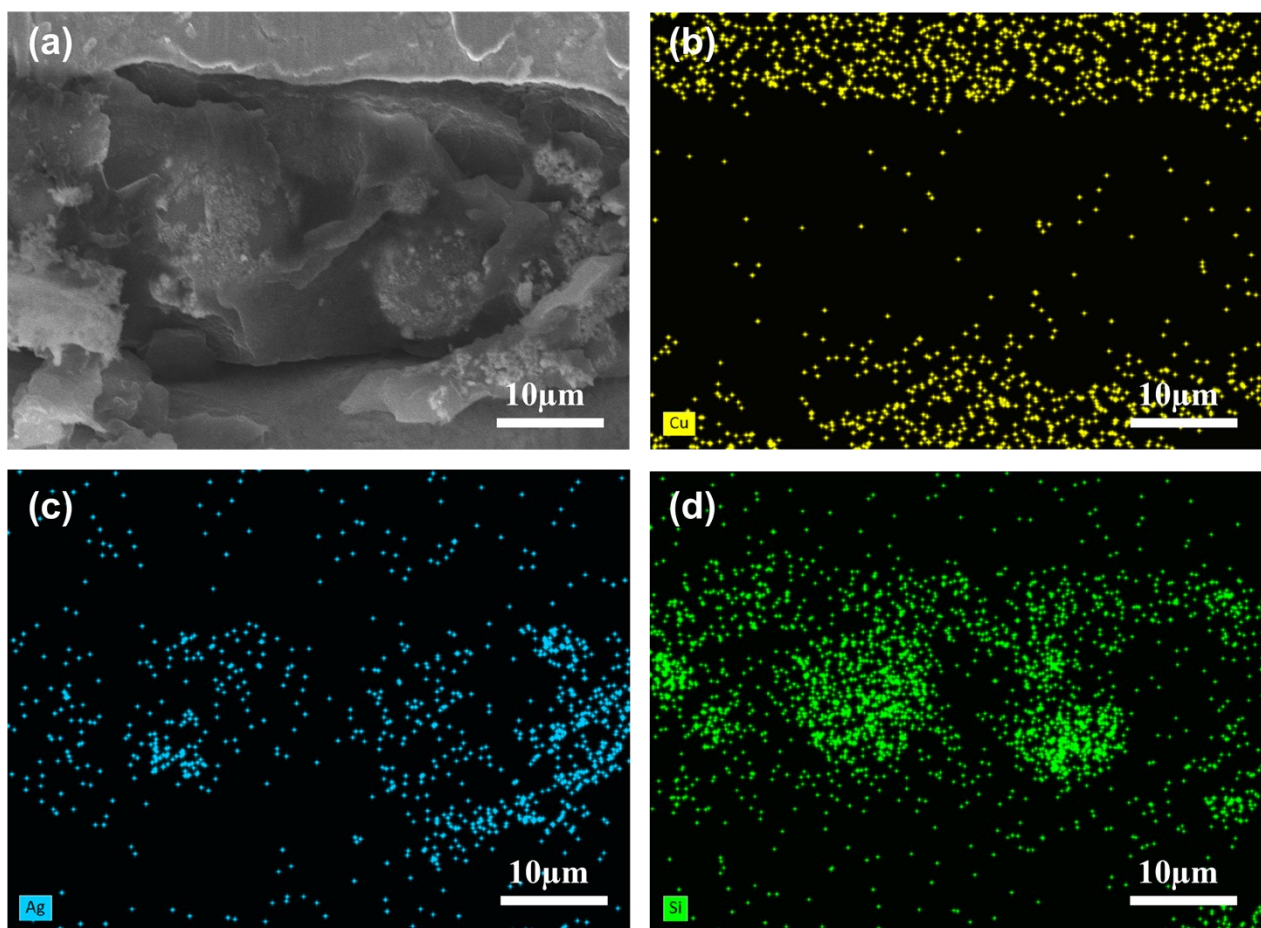

**Figure S9.** Cross-sectional SEM image and EDS elemental mapping of the S-ACF after hot-press curing between two Cu electrodes. (a) Cross-sectional SEM micrograph of the S-ACF laminated between two Cu electrodes after hot pressing. (b–d) EDS elemental maps showing the distribution of (b) Cu, (c) Ag, and (d) Si.

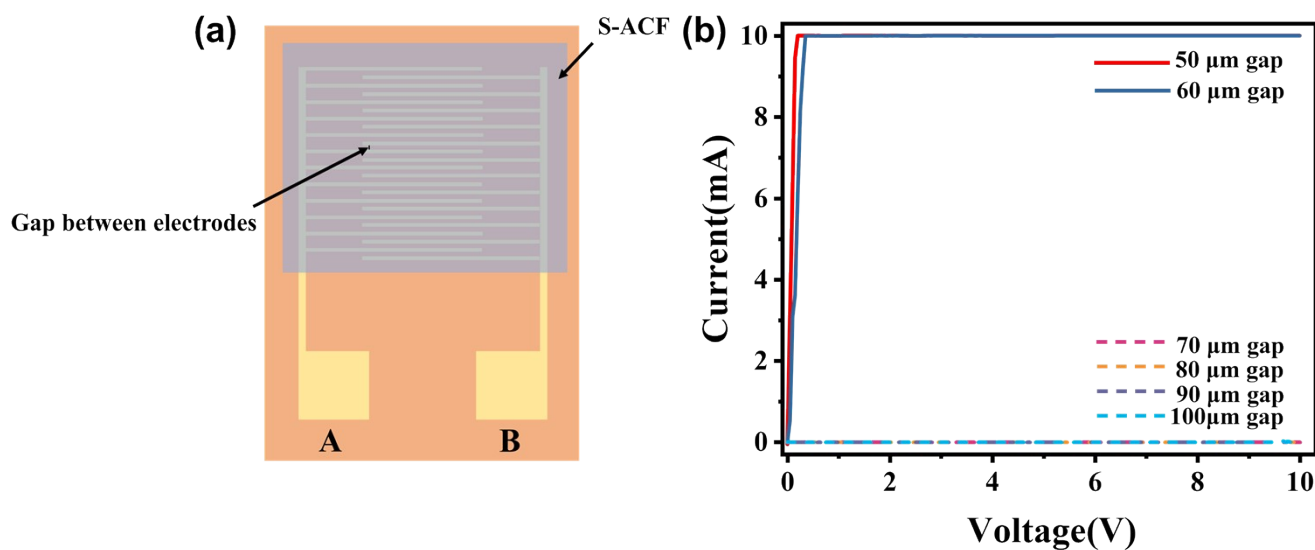

**Figure S10.** (a) Schematic illustration of the test setup for evaluating the electrical resolution of the S-ACF. The electrodes consist of a PI film and Au circuits, and the S-ACF was hot-pressed onto the electrodes and cured. (b) Test electrodes with electrode gaps of 50, 60, 70, 80, 90, and 100  $\mu\text{m}$  were used to evaluate the electrical resolution of the S-ACF, and the corresponding I–V curves at different electrode gaps were measured

**Table S1.** Chemical formulations used to create superhydrophobic surfaces, showing the quantitative composition of each solution with different SiO<sub>2</sub> content.

| <b>SiO<sub>2</sub><br/>(mg)</b> | <b>Cyclohexane<br/>(ml)</b> | <b>SEBS<br/>(mg)</b> | <b>Formula</b> |
|---------------------------------|-----------------------------|----------------------|----------------|
| 100                             | 100                         | 200                  | 1              |
| 150                             | 100                         | 200                  | 2              |
| 200                             | 100                         | 200                  | 3              |
| 250                             | 100                         | 200                  | 4              |
| 300                             | 100                         | 200                  | 5              |
| 400                             | 100                         | 200                  | 6              |
| 450                             | 100                         | 200                  | 7              |
| 500                             | 100                         | 200                  | 8              |
| 550                             | 100                         | 200                  | 9              |
| 600                             | 100                         | 200                  | 10             |

**Table S2.** Evolution of Z-axis and XY-plane electrical resistance of the ACF during an accelerated aging test at 85°C and 85% relative humidity (RH).

| <b>Time<br/>(h)</b> | <b>Contact resistance<br/>(Z-axis, <math>\Omega</math>)</b> | <b>Insulation resistance<br/>(XY plane, <math>\Omega</math>)</b> |
|---------------------|-------------------------------------------------------------|------------------------------------------------------------------|
| 0                   | 1.58                                                        | $> 10^6$                                                         |
| 24                  | 1.61                                                        | $> 10^6$                                                         |
| 48                  | 1.67                                                        | $> 10^6$                                                         |
| 72                  | 1.74                                                        | $> 10^6$                                                         |
| 96                  | 1.83                                                        | $> 10^6$                                                         |
| 120                 | 2.04                                                        | $> 10^6$                                                         |
| 144                 | 2.27                                                        | $> 10^6$                                                         |
| 168                 | 2.88                                                        | $> 10^6$                                                         |
| 192                 | 3.04                                                        | $> 10^6$                                                         |
| 216                 | 3.21                                                        | $> 10^6$                                                         |
| 240                 | 3.53                                                        | $> 10^6$                                                         |
| 264                 | 3.67                                                        | $> 10^6$                                                         |
| 288                 | 3.61                                                        | $> 10^6$                                                         |
| 312                 | 3.83                                                        | $> 10^6$                                                         |
| 336                 | 4.01                                                        | $> 10^6$                                                         |

**Table S3.** Evolution of Z-axis and XY-plane electrical resistance of the S-ACF during an accelerated aging test at 85°C and 85% relative humidity (RH).

| <b>Time<br/>(h)</b> | <b>Contact resistance<br/>(Z-axis, <math>\Omega</math>)</b> | <b>Insulation resistance<br/>(XY plane, <math>\Omega</math>)</b> |
|---------------------|-------------------------------------------------------------|------------------------------------------------------------------|
| 0                   | 1.64                                                        | $> 10^6$                                                         |
| 24                  | 1.67                                                        | $> 10^6$                                                         |
| 48                  | 1.61                                                        | $> 10^6$                                                         |
| 72                  | 1.69                                                        | $> 10^6$                                                         |
| 96                  | 1.74                                                        | $> 10^6$                                                         |
| 120                 | 1.80                                                        | $> 10^6$                                                         |
| 144                 | 1.85                                                        | $> 10^6$                                                         |
| 168                 | 1.83                                                        | $> 10^6$                                                         |
| 192                 | 1.88                                                        | $> 10^6$                                                         |
| 216                 | 1.91                                                        | $> 10^6$                                                         |
| 240                 | 2.03                                                        | $> 10^6$                                                         |
| 264                 | 2.11                                                        | $> 10^6$                                                         |
| 288                 | 2.10                                                        | $> 10^6$                                                         |
| 312                 | 2.82                                                        | $> 10^6$                                                         |
| 336                 | 3.11                                                        | $> 10^6$                                                         |
